# Supplementary material for: Transcriptomic Changes in Medicago truncatula and Lotus japonicus Root Nodules during Drought Stress
Source: MDPI journal article supplement (doi:10.3390/ijms20051204), 2019-03-09
Supplement: s1 [file s1]

# Transcriptomic changes in *Medicago truncatula* and *Lotus japonicus* root nodules during drought stress

Izabela Sańko-Sawczenko<sup>1</sup>, Barbara Łotocka<sup>1</sup>, Jakub Mielecki<sup>2</sup>, Hanna Rekosz-Burlaga<sup>3</sup> and Weronika Czarnocka<sup>1,\*</sup>

<sup>1</sup> Department of Botany, Faculty of Agriculture and Biology, Warsaw University of Life Sciences, Nowoursynowska 159, 02-776 Warsaw, Poland; izabela\_sanko\_sawczenko@sggw.pl (I.S.-S.); barbara\_lotocka@sggw.pl (B.Ł.);

<sup>2</sup> Department of Plant Genetics, Breeding and Biotechnology, Faculty of Horticulture, Biotechnology and Landscape Architecture, Warsaw University of Life Sciences, Nowoursynowska 159, 02-776 Warsaw, Poland; jakub\_mielecki@sggw.pl (J.M.);

<sup>3</sup> Department of Microbial Biology, Faculty of Agriculture and Biology, Warsaw University of Life Sciences, Nowoursynowska 159, 02-776 Warsaw, Poland; hanna\_rekosz\_burlaga@sggw.pl (H.R.-B.);

\* Correspondence: weronika\_czarnocka@sggw.pl; Tel.: +48-22-59-326-61

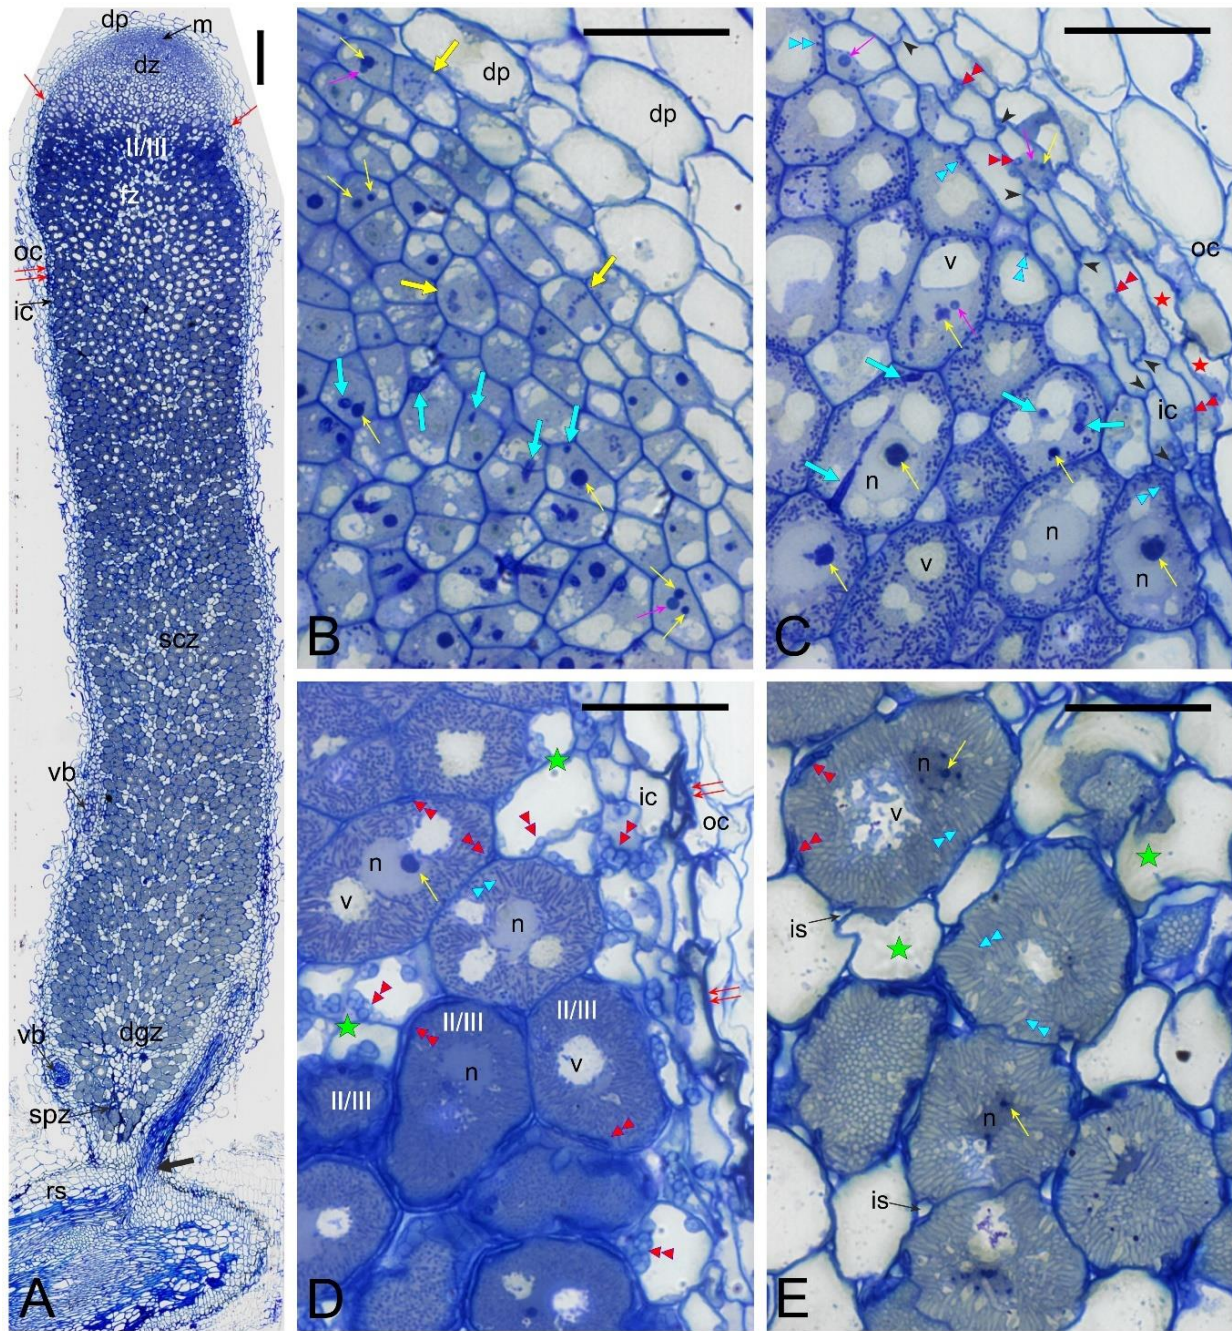

**Figure S1.** Structure of a representative *Medicago truncatula* root nodule sampled at T0 - from well-watered plants. Nodule central sagittal longisection showing the general anatomy (A). Boundary of the nodule meristem and infection zone (B). Nodule cortex at the mid-part of the bacteroid tissue differentiation zone (C). Proximal part of the differentiation zone (D). Bacteroid-containing tissue in the senescent zone (E). Labels: dp - non-specialized distal parenchyma of the nodule cortex; dgz - degraded zone; dz - differentiation zone; fz: fully-differentiated bacteroid-containing tissue; ic - inner cortical layers; m - rhizobia-free nodule meristem; n - nuclei; oc - outer cortical parenchyma; rs - root stele; scz - senescent zone; spz - saprotrophic zone; v - vacuole; vb - vascular bundles; II/III - II/III interzone; arrowheads - anticlinal walls; black arrow - vascular bundles that merged; blue arrows - infection thread apices; blue double arrowheads - cells containing symbiosomes; double red arrows - proximal part of dz; green asterisks - amyloplasts in the non-infected cells; pink asterisks - cortical endodermis; red arrows - first differentiated cells of the uniseriate cortical endodermis; red double arrowheads - collapsed cells of the cortical endodermis; red double arrowheads - large flattened amyloplasts. Bars: 200 pm (A), 50 pm (B-E).

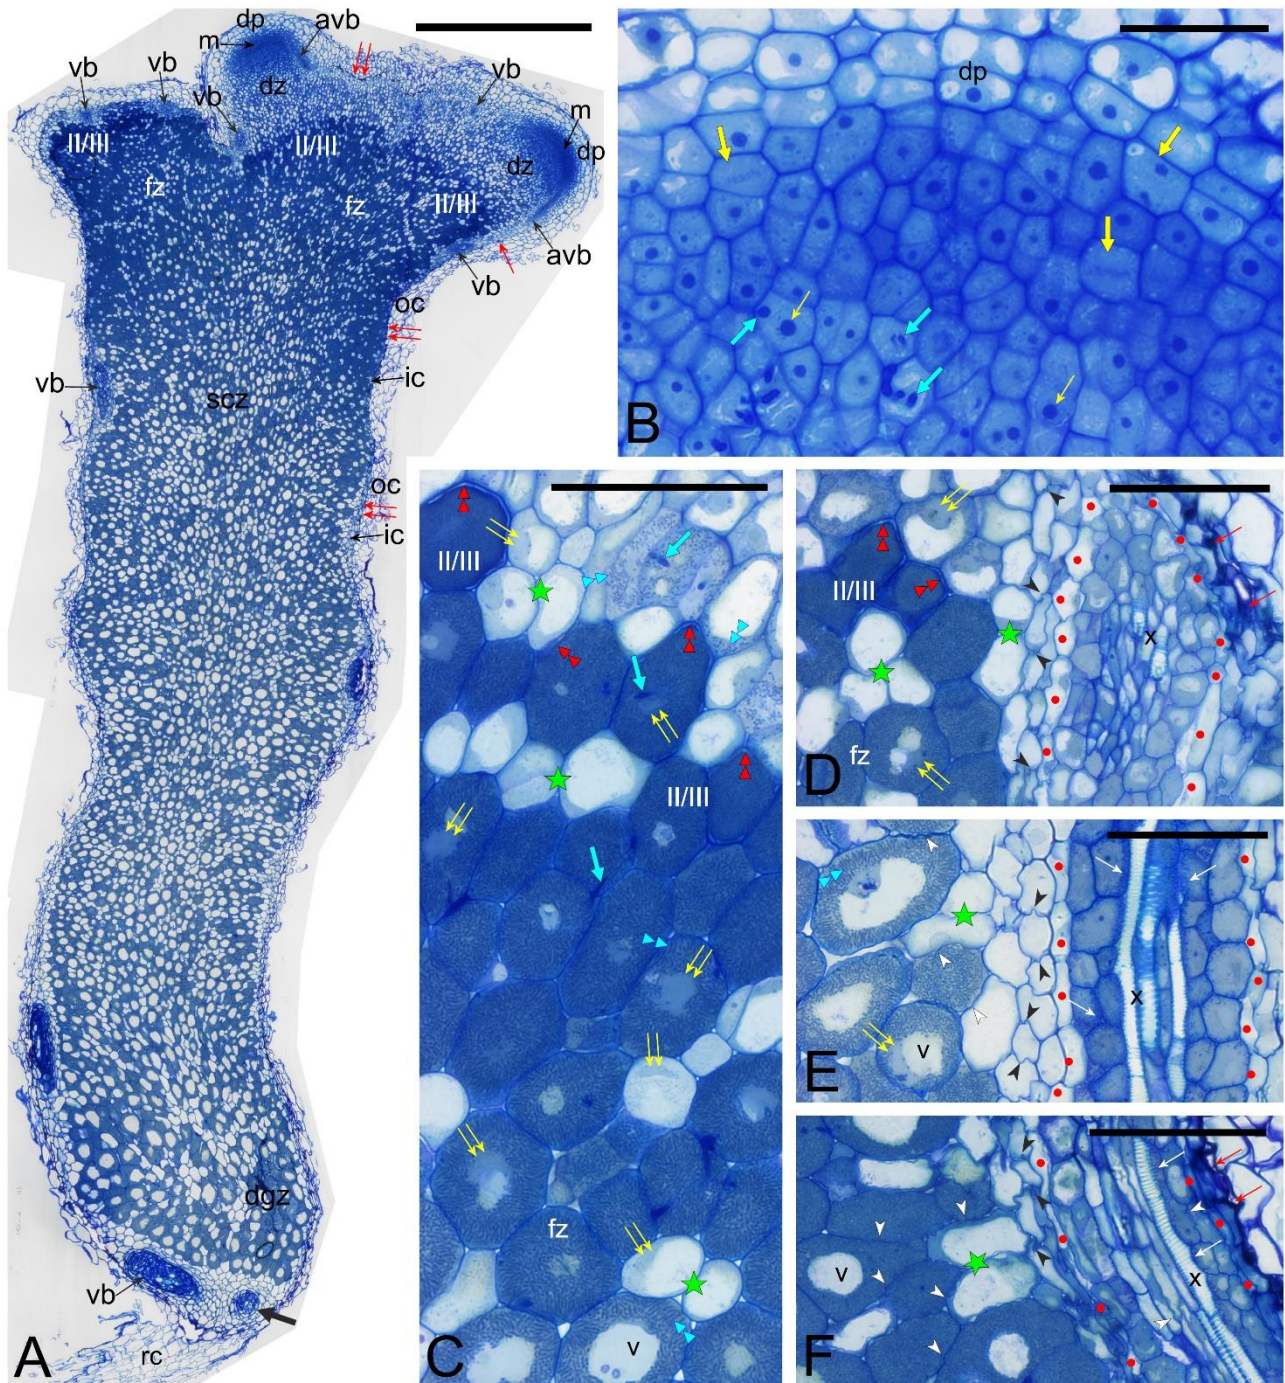

**Figure S2.** Structure of a representative mature *Medicago truncatula* root nodule sampled at T10. Nodule central sagittal longisection showing general anatomy (A). Boundary of the nodule meristem and infection zone (B). Central part of the bacteroid-containing tissue in the II/III interzone and dinitrogen fixation zone (C). Lateral part of bacteroid tissue in the II/III interzone together with the adjoining cortical tissues and vascular bundle (D). Lateral part of bacteroid tissue in the fixation zone together with the adjoining cortical tissues and vascular bundle (E). Labels: avb - apical parts of the nodule vascular bundles; dp - non-specialized distal parenchyma of the nodule cortex; dgz - degraded zone; dz - differentiation zone; fz: fully-differentiated bacteroid-containing tissue; ic - inner cortical layers; m - rhizobia-free nodule meristem; oc -outer cortical parenchyma; rc - root cortex; scz - senescent zone; v – vacuole; vb - vascular bundles; x - the tracheary elements; II/III - II/III interzone; large yellow arrows: - cytokinesis and two metaphase cells; red dots - vascular endodermis; white arrowheads - sinuous cell walls; yellow double arrows – nuclei. Bars: 200 pm (A), 25 pm (B), 50 pm (C-F).

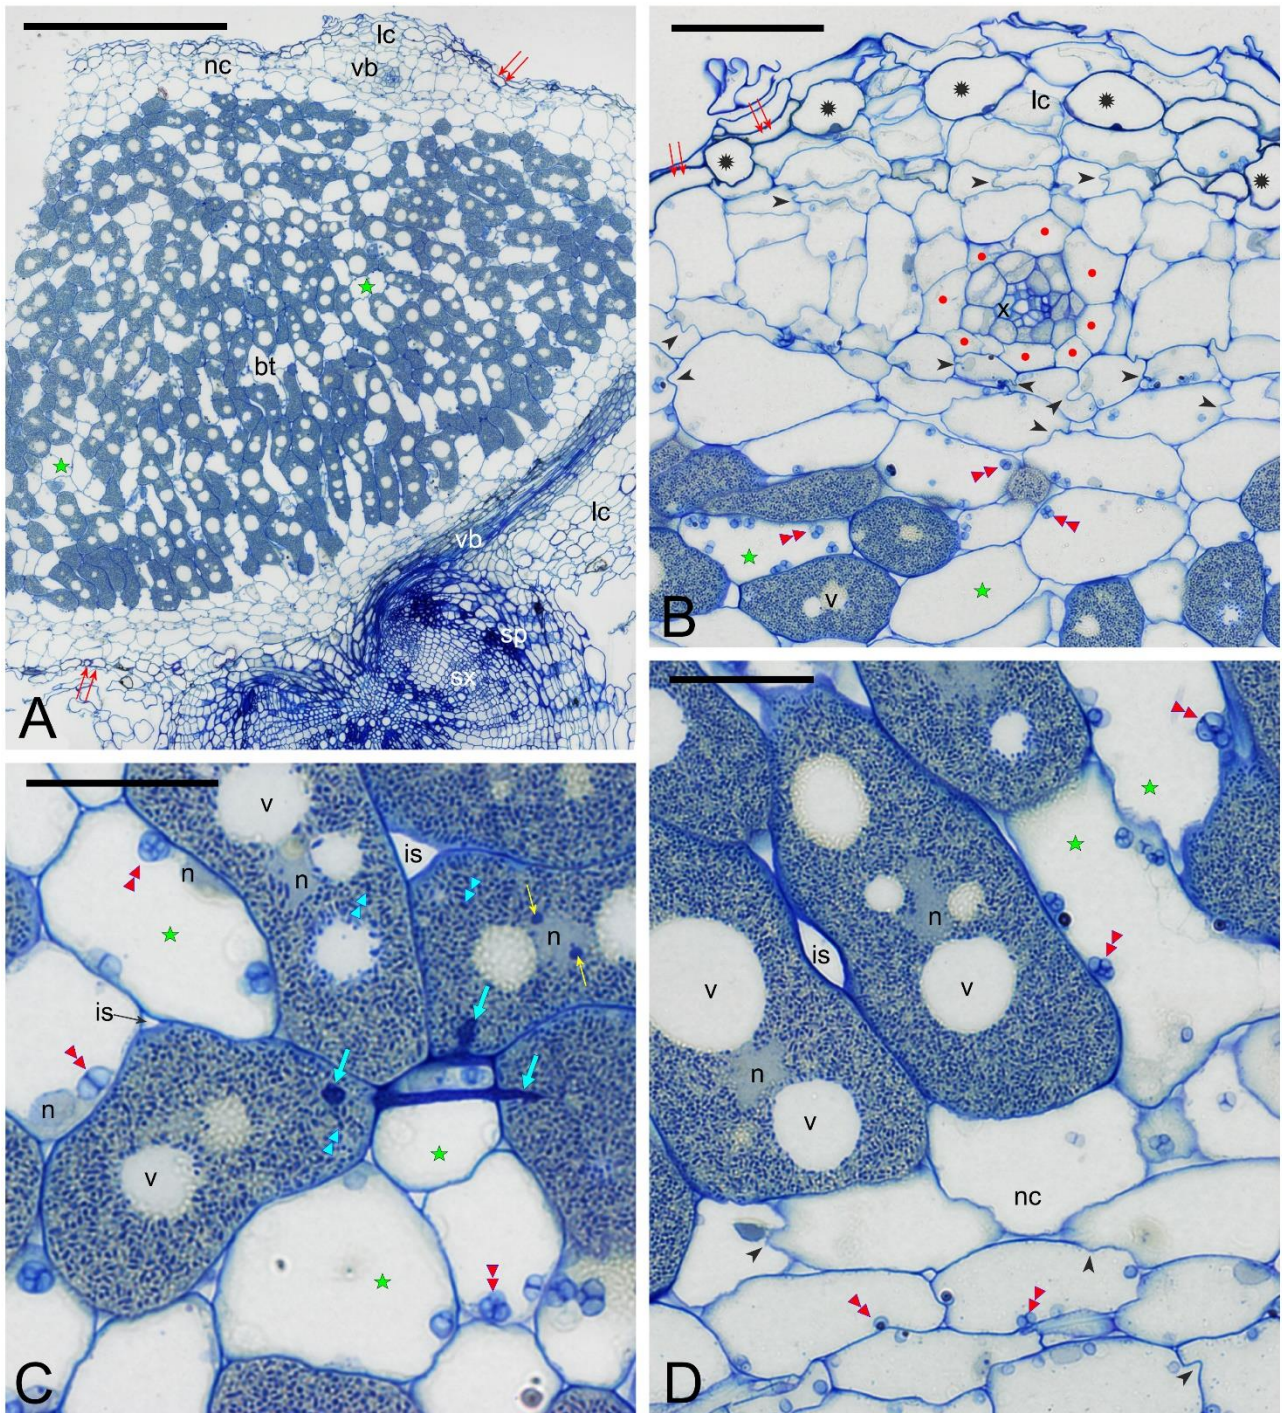

**Figure S3.** Structure of a representative *Lotus japonicus* root nodule sampled at T0 - from well-watered plants. Nodule central longisection (transversal vs. the root) showing general anatomy (**A**). The vascular bundle apex surrounded by nodule cortex cells (**B**). Fragments of bacteroid-containing central parenchyma at nodule apex (**C**) and base (**D**). Labels: bt - bacteroid -containing central parenchyma; is - intercellular space; lc - lenticels; n - nuclei; nc - nodule cortex; sp - secondary phloem; sx - secondary xylem; v - vacuole; vb - vascular bundles; arrowheads - sinuous cell walls; black arrowheads - sinuous cell walls; blue arrows - infection threads; blue double arrowheads - symbiosomes; double red arrows - cortical endodermis; green asterisks - non-infected cells; red double arrowheads - rounded amyloplasts; red dots - vascular endodermis; rosettes - turgid cells; thin yellow arrows - nucleoli; x - tracheary elements. Bars: 600 pm (A), 100 pm (B), 50 pm (C, D).

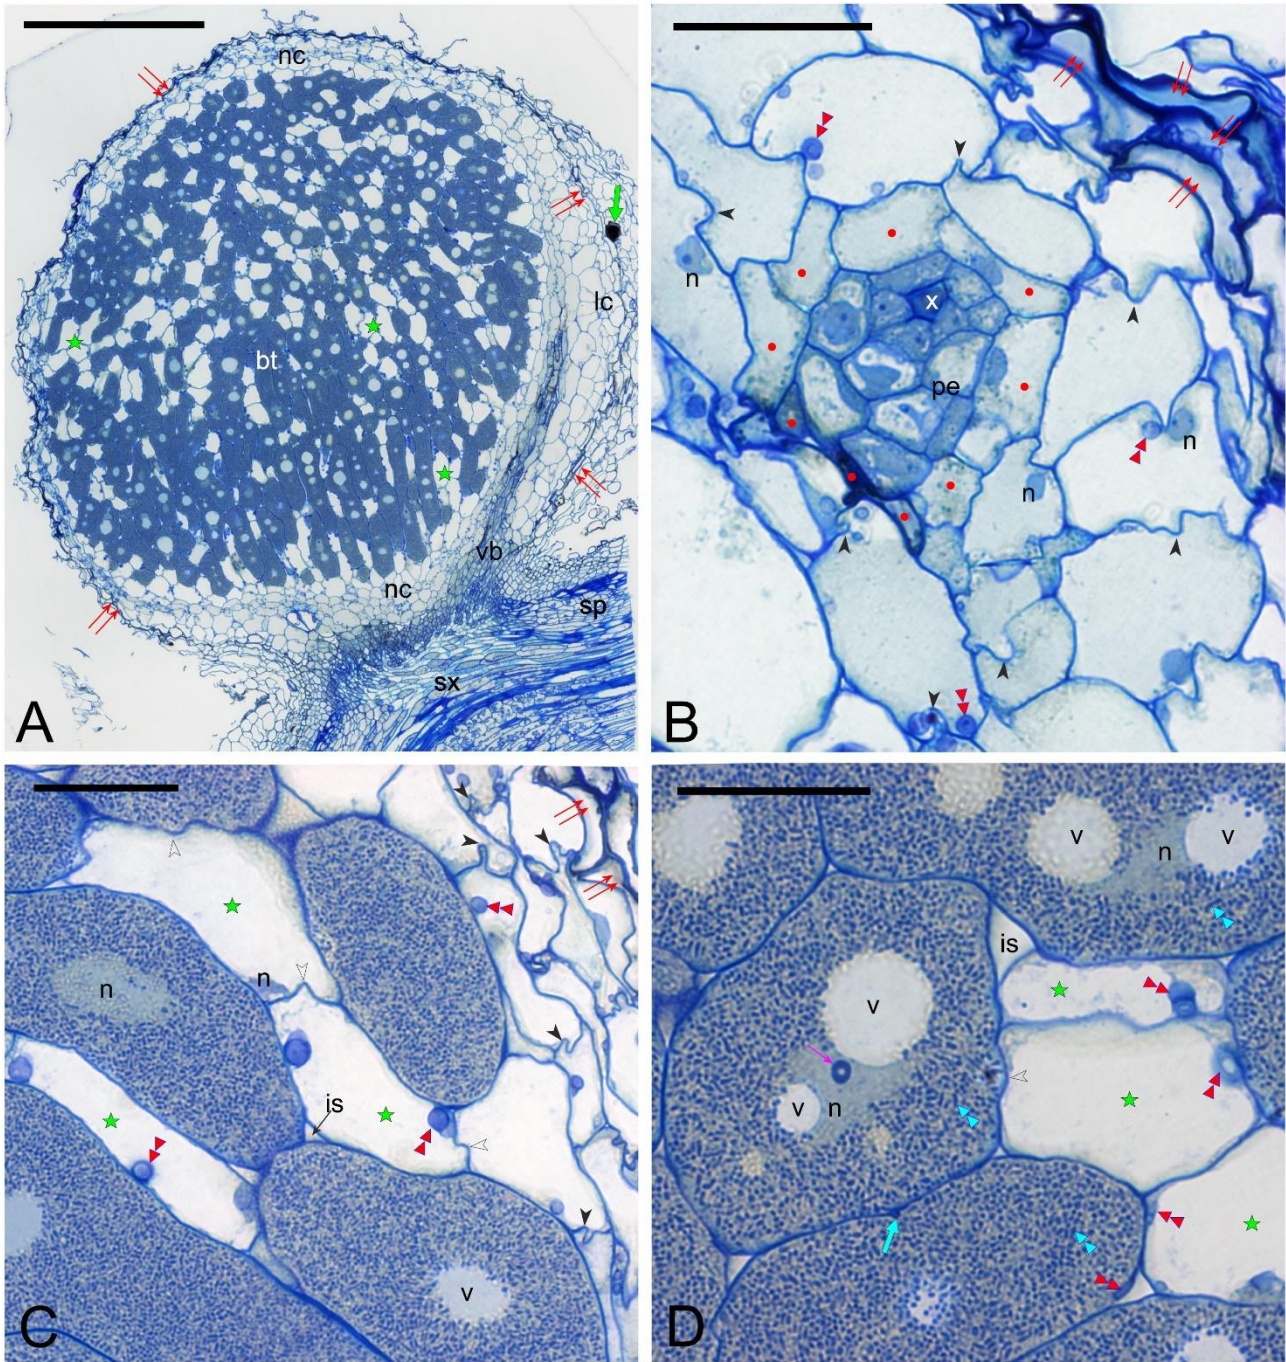

**Figure S4.** Structure of a representative mature *Lotus japonicus* root nodule sampled at T10. Nodule central sagittal longisection showing general anatomy (A). Vascular bundle apex surrounded by nodule cortex cells (B). Fragments of bacteroid-containing central parenchyma at nodule apex (C) and base (D). Labels: is – intercellular space; lc – lenticels; green arrow - tannin cell; n – nuclei; nc - nodule cortex; pe – pericycle; sp - secondary phloem; sx - secondary xylem; v – vacuole; vb - vascular bundles; black arrowheads – sinuous cell walls; blue double arrowheads – symbiosomes; empty arrowheads – sinuous cell walls; green asterisks - non-infected cells; red double arrows – cortical endodermis; red double arrowheads – rounded amyloplasts; thin pink arrow – Cajal body. Bars: 600 pm (A), 50 pm (B), 25 pm (C, D).

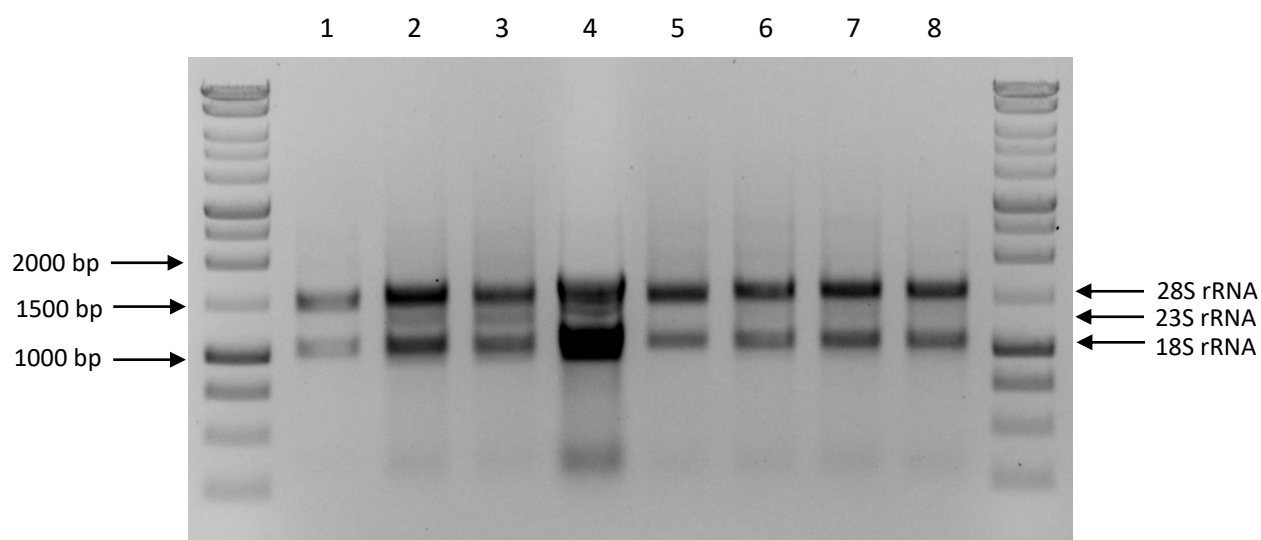

**Figure S5.** Electrophoretic separation of RNA samples. Wells 1–4 represent samples of RNA extracted from *M. truncatula*, while 5–8 from *L. japonicus*. Wells 1 and 5 contained RNA from roots, while 2 and 6, 3 and 7, 4 and 8 contained RNA from root nodules collected from control (T0) and drought-stressed plants (T2 and T4), respectively. bp- base pairs

**Table S1.** Twenty most up- and down-regulated *M. truncatula* genes in the nodules in comparison to the roots.

| Gene ID       | Description                                                 | log <sub>2</sub> FC |
|---------------|-------------------------------------------------------------|---------------------|
| MTR_2g030470  | stress up-regulated Nod 19 protein                          | 12.50               |
| MTR_4g065085  | late nodulin                                                | 12.23               |
| MTR_2g103313  | embryo-specific protein                                     | 12.16               |
| MTR_0416s0030 | leginsulin related MtN11/16/17 family                       | 12.06               |
| MTR_3g031340  | Nodule Cysteine-Rich (NCR) secreted peptide                 | 11.96               |
| MTR_4g130800  | plastocyanin-like domain protein                            | 11.79               |
| MTR_3g052100  | Nodule Cysteine-Rich (NCR) secreted peptide                 | 11.73               |
| MTR_4g065390  | Nodule Cysteine-Rich (NCR) secreted peptide                 | 11.71               |
| MTR_0386s0010 | Nodule Cysteine-Rich (NCR) secreted peptide                 | 11.50               |
| MTR_4g066160  | unknown protein                                             | 11.47               |
| MTR_1g042940  | Nodule Cysteine-Rich (NCR) secreted peptide                 | 11.26               |
| MTR_3g020980  | Nodule Cysteine-Rich (NCR) secreted peptide                 | 11.23               |
| MTR_3g015845  | Nodule Cysteine-Rich (NCR) secreted peptide                 | 11.18               |
| MTR_3g464210  | sulfate transporter-like protein                            | 11.18               |
| MTR_0337s0090 | Nodule Cysteine-Rich (NCR) secreted peptide                 | 11.18               |
| MTR_4g017920  | Nodule Cysteine-Rich (NCR) secreted peptide                 | 11.17               |
| MTR_4g059837  | Nodule Cysteine-Rich (NCR) secreted peptide                 | 11.13               |
| MTR_7g029760  | Nodule Cysteine-Rich (NCR) secreted peptide                 | 11.11               |
| MTR_7g034210  | Kunitz type trypsin inhibitor / miraculin                   | 11.10               |
| MTR_5g041610  | leghemoglobin Lb120-1                                       | 11.09               |
| MTR_8g045640  | pathogenesis-related protein bet V I family protein         | -9.45               |
| MTR_4g118610  | sugar porter (SP) family MFS transporter                    | -9.46               |
| MTR_1g038680  | cationic peroxidase                                         | -9.47               |
| MTR_2g064425  | monoterpene synthase                                        | -9.68               |
| MTR_5g017860  | peroxidase family protein                                   | -9.72               |
| MTR_2g069300  | 1-aminocyclopropane-1-carboxylate oxidase-like protein      | -9.84               |
| MTR_1g092870  | hippocampus abundant transcript-like protein                | -9.90               |
| MTR_2g020710  | sugar porter (SP) family MFS transporter                    | -10.05              |
| MTR_0018s0230 | glutamate receptor 2                                        | -10.22              |
| MTR_4g069810  | specific tissue protein                                     | -10.27              |
| MTR_2g044140  | flavin containing monooxygenase-like protein, putative      | -10.45              |
| MTR_1g034120  | gibberellin 2-beta-dioxygenase                              | -10.54              |
| MTR_5g074710  | peroxidase family protein                                   | -10.79              |
| MTR_8g028780  | oxidoreductase/ferric-chelate reductase                     | -10.80              |
| MTR_5g074580  | orcinol O-methyltransferase                                 | -10.93              |
| MTR_4g114340  | peptide/nitrate transporter                                 | -11.38              |
| MTR_5g075680  | Mn-specific cation diffusion facilitator transporter MTP8.1 | -11.42              |
| MTR_3g088675  | chalcone and stilbene synthase family protein               | -11.82              |
| MTR_3g009010  | glycoside hydrolase family 5 protein                        | -12.59              |
| MTR_8g045890  | embryonic abundant-like protein                             | -14.09              |

**Table S2.** Twenty most up- and down-regulated *L. japonicus* genes in the nodules in comparison to the roots.

| Gene ID       | Description                                                                     | log <sub>2</sub> FC |
|---------------|---------------------------------------------------------------------------------|---------------------|
| Lj4g3v1500410 | Metal transporter                                                               | 14.20               |
| Lj1g3v0318450 | PREDICTED: casein kinase I isoform delta-like                                   | 13.55               |
| Lj3g3v0139560 | Auxin-induced protein 5NG4, Nodulin MtN21 /EamA-like transporter family protein | 13.30               |
| Lj0g3v0205259 | PREDICTED: bifunctional nitrilase/nitrile hydratase NIT4A-like                  | 12.84               |
| Lj1g3v4515810 | Peptide transporter PTR3-A                                                      | 12.38               |
| Lj0g3v0205249 | unknown protein                                                                 | 12.33               |
| Lj0g3v0289849 | cell wall protein                                                               | 12.08               |
| Lj0g3v0332609 | Putative polyol transporter protein 3                                           | 12.07               |
| Lj4g3v0336000 | PREDICTED: WAT1-related protein At1g68170-like                                  | 11.74               |
| Lj0g3v0328799 | PREDICTED: ribonucleoside-diphosphate reductase small chain-like                | 11.68               |
| Lj0g3v0091689 | Copper transporter                                                              | 11.40               |
| Lj2g3v1729000 | unknown protein                                                                 | 11.35               |
| Lj1g3v3690210 | unknown protein                                                                 | 11.34               |
| Lj5g3v0035290 | Leghemoglobin                                                                   | 11.30               |
| Lj1g3v3690220 | unknown protein                                                                 | 11.28               |
| Lj1g3v3690250 | Homocitrate synthase                                                            | 11.27               |
| Lj1g3v3690240 | unknown protein                                                                 | 11.15               |
| Lj1g3v3690230 | Homocitrate synthase                                                            | 11.14               |
| Lj5g3v0465970 | Leghemoglobin                                                                   | 11.12               |
| Lj1g3v3441260 | F-box/kelch-repeat protein                                                      | 11.02               |
| Lj0g3v0092569 | Type IIIa membrane protein cp-wap11                                             | -8.34               |
| Lj3g3v0797430 | Pectinesterase                                                                  | -8.42               |
| Lj0g3v0297549 | Cytokinin-O-glucosyltransferase                                                 | -8.46               |
| Lj0g3v0114299 | PREDICTED: 8-hydroxyquercetin 8-O-methyltransferase-like                        | -8.50               |
| Lj0g3v0200679 | Pectinesterase                                                                  | -8.55               |
| Lj0g3v0085739 | unknown protein                                                                 | -8.59               |
| Lj1g3v4830170 | PREDICTED: chitinase 10-like                                                    | -8.61               |
| Lj0g3v0134529 | PREDICTED: MLP-like protein 34-like                                             | -8.61               |
| Lj4g3v2023750 | Double-strand-break repair protein rad21                                        | -8.71               |
| Lj0g3v0285979 | Sieve element occlusion by forisomes 1                                          | -8.83               |
| Lj0g3v0246819 | Matrix metalloprotease                                                          | -8.91               |
| Lj5g3v1604480 | Pectinesterase                                                                  | -8.93               |
| Lj1g3v2067530 | PREDICTED: carotenoid 9,10(9',10')-cleavage dioxygenase-like                    | -9.02               |
| Lj0g3v0360999 | ferric reductase                                                                | -9.04               |
| Lj4g3v0938850 | Receptor protein kinase PERK1                                                   | -9.23               |
| Lj4g3v0189800 | PREDICTED: peroxidase 7-like                                                    | -9.52               |
| Lj0g3v0220289 | PREDICTED: GDSL esterase/lipase At1g29670-like                                  | -9.74               |
| Lj1g3v4551230 | K(+)/H(+) antiporter                                                            | -10.03              |
| Lj3g3v0115990 | unknown protein                                                                 | -11.07              |
| Lj0g3v0356449 | Beta-ocimene synthase                                                           | -11.14              |

**Table S3.** Twenty most up- and down-regulated *M. truncatula* genes after four days of water deprivation.

| Gene ID       | Description                                                 | log <sub>2</sub> FC |           |
|---------------|-------------------------------------------------------------|---------------------|-----------|
|               |                                                             | T2 vs. T0           | T4 vs. T0 |
| MTR_1308s0010 | flavin containing monooxygenase-like protein, putative      | 1.71                | 5.37      |
| MTR_1088s0010 | flavin-binding monooxygenase-like protein                   | 1.91                | 5.35      |
| MTR_4g080700  | papain family cysteine protease                             | 2.53                | 5.24      |
| MTR_2g075830  | papain family cysteine protease                             | 2.68                | 5.22      |
| MTR_4g028510  | F-box protein interaction domain protein                    | 4.64                | 5.03      |
| MTR_6g086485  | unknown protein                                             | 2.29                | 4.83      |
| MTR_7g081050  | triacylglycerol lipase-like protein                         | 2.31                | 4.82      |
| MTR_7g100070  | type I inositol-1,4,5-trisphosphate 5-phosphatase           | 2.94                | 4.72      |
| MTR_1g040335  | Lipid transfer protein                                      | 1.76                | 4.57      |
| MTR_4g109140  | DUF538 family protein                                       | 2.36                | 4.55      |
| MTR_4g057585  | serine carboxypeptidase-like protein                        | 2.22                | 4.54      |
| MTR_4g057595  | serine carboxypeptidase-like protein                        | 2.13                | 4.49      |
| MTR_4g011250  | late embryogenesis abundant protein group 3 protein         | 3.51                | 4.49      |
| MTR_2g062430  | DUF946 family protein                                       | 2.32                | 4.47      |
| MTR_4g107930  | papain family cysteine protease                             | 1.89                | 4.47      |
| MTR_1g083180  | myb-like DNA-binding domain, shaqyf class protein           | 1.60                | 4.46      |
| MTR_6g445520  | replication factor-A carboxy-terminal domain protein        | 1.30                | 4.36      |
| MTR_4g079770  | papain family cysteine protease                             | 1.63                | 4.36      |
| MTR_4g080730  | papain family cysteine protease                             | 2.09                | 4.31      |
| MTR_0001s0660 | zinc-binding alcohol dehydrogenase family protein           | 1.06                | 4.24      |
| MTR_5g094570  | cytochrome P450 family 71 protein                           | -2.94               | -5.54     |
| MTR_3g063170  | (3S)-linalool/(E)-nerolidol/(E,E)-geranyl linalool synthase | -3.13               | -5.72     |
| MTR_1g050382  | zinc finger, C3HC4 type (RING finger) protein               | -3.06               | -5.75     |
| MTR_0927s0010 | (3S)-linalool/(E)-nerolidol/(E,E)-geranyl linalool synthase | -2.84               | -5.78     |
| MTR_2g040830  | chitinase                                                   | -2.04               | -5.82     |
| MTR_5g094560  | cytochrome P450 family 71 protein                           | -3.33               | -5.86     |
| MTR_5g094540  | cytochrome P450 family 71 protein                           | -3.01               | -5.89     |
| MTR_6g064980  | (3S)-linalool/(E)-nerolidol/(E,E)-geranyl linalool synthase | -3.68               | -5.94     |
| MTR_6g084770  | cytochrome P450 family 71 protein                           | -3.13               | -5.97     |
| MTR_8g020990  | seed linoleate 9S-lipoxygenase                              | -3.55               | -5.99     |
| MTR_2g007960  | auxin-induced 5NG4-like protein                             | -4.34               | -6.05     |
| MTR_4g009590  | UPF0481 plant-like protein                                  | -4.92               | -6.13     |
| MTR_3g063120  | (3S)-linalool/(E)-nerolidol/(E,E)-geranyl linalool synthase | -3.25               | -6.18     |
| MTR_3g465090  | (3S)-linalool/(E)-nerolidol/(E,E)-geranyl linalool synthase | -3.26               | -6.19     |
| MTR_4g033200  | isoflavone-7-O-methyltransferase                            | -3.25               | -6.22     |
| MTR_7g057340  | (E)-beta-caryophyllene synthase                             | -3.76               | -6.33     |
| MTR_2g086040  | cytochrome P450 family 94 protein                           | -3.60               | -6.55     |
| MTR_4g033015  | isoflavone-7-O-methyltransferase                            | -3.17               | -6.72     |
| MTR_7g057390  | (E)-beta-caryophyllene synthase                             | -3.26               | -7.17     |
| MTR_5g066690  | zinc finger, C3HC4 type (RING finger) protein               | -3.29               | -7.21     |

**Table S4.** Twenty most up- and down-regulated *L. japonicus* genes after four days of water deprivation.

| Gene ID       | Description                                                            | log. FC   |           |
|---------------|------------------------------------------------------------------------|-----------|-----------|
|               |                                                                        | T2 vs. T0 | T4 vs. T0 |
| Lj1g3v4669300 | Thaumatococcus-like protein                                            | 1.40      | 8.13      |
| Lj3g3v2225730 | PREDICTED: late embryogenesis abundant protein 1-like                  | 1.74      | 7.40      |
| Lj2g3v3292410 | unknown protein                                                        | 3.28      | 7.24      |
| Lj2g3v0741960 | unknown protein                                                        | 2.22      | 7.08      |
| Lj0g3v0200689 | unknown protein                                                        | 3.36      | 6.66      |
| Lj1g3v4790770 | Galactinol synthase                                                    | 1.87      | 6.57      |
| Lj1g3v1720110 | PREDICTED: cytochrome b5-like                                          | 1.67      | 6.53      |
| Lj1g3v1341630 | PREDICTED: NAC domain-containing protein 19                            | 0.92      | 6.51      |
| Lj3g3v2039900 | unknown protein                                                        | 1.96      | 6.42      |
| Lj1g3v3381270 | unknown protein                                                        | 1.25      | 6.36      |
| Lj0g3v0346819 | NAC domain protein NAC3                                                | 3.91      | 6.24      |
| Lj0g3v0169979 | unknown protein                                                        | 0.00      | 6.20      |
| Lj4g3v1534900 | PREDICTED: U-box domain-containing protein 19-like                     | 3.68      | 6.20      |
| Lj1g3v3137680 | Auxin-induced protein 5NG4                                             | 1.15      | 6.00      |
| Lj1g3v4862910 | unknown protein                                                        | 2.98      | 5.99      |
| Lj0g3v0000069 | Cysteine proteinase                                                    | -0.71     | 5.97      |
| Lj2g3v2543820 | Aspartic proteinase nepenthesin-1                                      | 2.32      | 5.93      |
| Lj2g3v2553830 | PREDICTED: aspartic proteinase nepenthesin-1-like                      | 2.18      | 5.92      |
| Lj3g3v1641950 | Cysteine proteinase                                                    | 0.00      | 5.92      |
| Lj4g3v0451200 | CASP-like protein                                                      | 0.92      | 5.92      |
| Lj0g3v0037739 | Type II inositol-1,4,5-trisphosphate 5-phosphatase                     | -2.07     | -4.17     |
| Lj0g3v0040079 | PREDICTED: auxin-induced protein X10A-like                             | -1.64     | -4.31     |
| Lj0g3v0058079 | Cytochrome P450                                                        | -0.52     | -4.33     |
| Lj0g3v0091749 | unknown protein                                                        | -3.03     | -4.47     |
| Lj2g3v2902510 | unknown protein                                                        | -0.96     | -4.54     |
| Lj1g3v3439010 | unknown protein                                                        | -1.66     | -4.60     |
| Lj3g3v2118200 | unknown protein                                                        | -1.11     | -4.71     |
| Lj1g3v4831740 | PREDICTED: polygalacturonase At1g48100-like                            | -0.88     | -4.91     |
| Lj5g3v2220310 | PREDICTED: probable pectate lyase 12-like                              | -1.20     | -5.02     |
| Lj2g3v2124690 | PREDICTED: protein FIZZY-RELATED 2-like                                | -3.19     | -5.09     |
| Lj2g3v1550530 | PREDICTED: long-chain-alcohol oxidase FAO4A-like                       | -2.14     | -5.33     |
| Lj0g3v0037719 | PREDICTED: type I inositol 1,4,5-trisphosphate 5-phosphatase CVP2-like | -2.66     | -5.43     |
| Lj1g3v0052160 | unknown protein                                                        | -2.25     | -5.50     |
| Lj0g3v0362339 | Cytochrome P450                                                        | -1.83     | -5.57     |
| Lj0g3v0340999 | PREDICTED: cyclin-U4-1-like                                            | -2.08     | -5.59     |
| Lj0g3v0318349 | unknown protein                                                        | -2.97     | -5.99     |
| Lj0g3v0081509 | unknown protein                                                        | -1.26     | -6.14     |
| Lj5g3v0529330 | PREDICTED: 14 kDa proline-rich protein DC2.15-like                     | -2.29     | -6.36     |
| Lj4g3v1037540 | GAST-like gene product                                                 | -3.28     | -6.53     |
| Lj2g3v2830880 | PREDICTED: abscisic acid receptor PYL4-like                            | -4.62     | -7.52     |

**Table S5.** Twenty most up- and down-regulated *S. meliloti* genes after two and four days of water deprivation.

| Gene ID    | Description                                          | log <sub>2</sub> FC |           |
|------------|------------------------------------------------------|---------------------|-----------|
|            |                                                      | T2 vs. T0           | T4 vs. T0 |
| DU99_26890 | antitoxin                                            | 2.91                | 1.38      |
| DU99_30990 | histidine kinase                                     | 2.43                | -0.22     |
| DU99_30995 | histidine kinase                                     | 2.19                | -0.55     |
| DU99_27180 | DNA topoisomerase                                    | 2.10                | -0.64     |
| DU99_30705 | transcriptional regulator                            | 1.94                | -0.76     |
| DU99_23220 | unknown protein                                      | 1.87                | -0.75     |
| DU99_17140 | unknown protein                                      | 1.68                | -0.42     |
| DU99_04335 | radical SAM protein                                  | 1.59                | -0.42     |
| DU99_22915 | unknown protein                                      | 1.58                | -0.41     |
| DU99_28870 | unknown protein                                      | 1.52                | 0.46      |
| DU99_07735 | RelE toxin                                           | 1.30                | -0.88     |
| DU99_05870 | MarR family transcriptional regulator                | 1.19                | -0.86     |
| DU99_14895 | unknown protein                                      | 1.11                | 0.38      |
| DU99_27175 | glycogen debranching protein                         | 1.10                | -0.08     |
| DU99_03830 | unknown protein                                      | 1.06                | 0.91      |
| DU99_09345 | LysR family transcriptional regulator                | 1.05                | -0.27     |
| DU99_06725 | DNA polymerase III subunit alpha                     | 1.05                | -0.08     |
| DU99_03800 | unknown protein                                      | 1.04                | 1.24      |
| DU99_05145 | cation/x3aproton antiporter                          | -1.29               | -0.70     |
| DU99_23265 | Nodulation protein N                                 | -2.65               | -0.66     |
| DU99_16195 | homogentisate 1,2-dioxygenase                        | 0.91                | 2.38      |
| DU99_16200 | MarR family transcriptional regulator                | 0.78                | 1.48      |
| DU99_25085 | unknown protein                                      | 0.81                | 1.38      |
| DU99_25090 | membrane protein                                     | 0.70                | 1.35      |
| DU99_29415 | guanine deaminase                                    | -0.17               | 1.25      |
| DU99_27195 | inosine-5-monophosphate dehydrogenase                | 1.06                | 1.16      |
| DU99_16190 | 2-keto-4-pentenoate hydratase                        | 0.40                | 1.14      |
| DU99_04230 | photosystem reaction center subunit H                | 0.79                | 1.12      |
| DU99_28340 | unknown protein                                      | 0.80                | 1.07      |
| DU99_16185 | maleylacetoacetate isomerase                         | 0.53                | 1.07      |
| DU99_20315 | MarR family transcriptional regulator                | -0.40               | -1.04     |
| DU99_18380 | penicillin-binding protein                           | -0.24               | -1.17     |
| DU99_00220 | Phosphoenolpyruvate carboxykinase                    | -0.72               | -1.20     |
| DU99_00725 | pilus assembly protein                               | -0.27               | -1.35     |
| DU99_12190 | cell division protein FtsQ                           | -0.10               | -1.38     |
| DU99_32055 | amino acid ABC transporter substrate-binding protein | -0.23               | -1.48     |
| DU99_09255 | membrane protein                                     | -0.66               | -1.53     |
| DU99_07710 | nitrite reductase                                    | -0.72               | -1.61     |
| DU99_26030 | cell division protein FtsK                           | -0.23               | -1.87     |
| DU99_32940 | MFS sugar transporter                                | -0.84               | -3.01     |

**Table S6.** Twenty most up- and down-regulated *M. loti* genes after four days of water deprivation.

| Gene ID | Description                                                          | log. FC   |           |
|---------|----------------------------------------------------------------------|-----------|-----------|
|         |                                                                      | T2 vs. T0 | T4 vs. T0 |
| msr8579 | unknown protein                                                      | 2.80      | 6.19      |
| msr9689 | unknown protein                                                      | 2.23      | 6.06      |
| msl2054 | unknown protein                                                      | 2.51      | 5.99      |
| ml11786 | unknown protein                                                      | 2.01      | 5.85      |
| msl9563 | unknown protein                                                      | 2.59      | 5.82      |
| msr7945 | unknown protein                                                      | 2.13      | 5.82      |
| ml11958 | unknown protein                                                      | 2.45      | 5.81      |
| mlr9657 | unknown protein                                                      | 2.56      | 5.81      |
| msl7942 | unknown protein                                                      | 2.90      | 5.81      |
| mlr0376 | unknown protein                                                      | 1.99      | 5.81      |
| msl1750 | unknown protein                                                      | 2.09      | 5.78      |
| msr8675 | unknown protein                                                      | 1.91      | 5.74      |
| msr0042 | unknown protein                                                      | 2.11      | 5.73      |
| msr8120 | unknown protein                                                      | 2.73      | 5.67      |
| msr4805 | unknown protein                                                      | 1.81      | 5.62      |
| msl9670 | unknown protein                                                      | 1.26      | 5.57      |
| ml16859 | unknown protein                                                      | 2.06      | 5.56      |
| msl3831 | unknown protein                                                      | 2.20      | 5.56      |
| msl1572 | unknown protein                                                      | 1.90      | 5.55      |
| msl7604 | unknown protein                                                      | 1.82      | 5.52      |
| mlr2932 | chemotaxis motc protein                                              | -0.63     | -2.72     |
| mlr0308 | 50S ribosomal protein L5                                             | -1.04     | -2.72     |
| mlr7768 | porin                                                                | -0.71     | -2.73     |
| mlr3345 | glutathione transferase                                              | -0.75     | -2.74     |
| mlr2935 | two-component response regulator                                     | -0.78     | -2.74     |
| mlr2959 | unknown protein                                                      | -0.52     | -2.75     |
| msl0722 | unknown protein                                                      | -0.58     | -2.76     |
| mlr2912 | flagellar basal-body rod protein\x3b FlgC                            | -1.12     | -2.76     |
| mlr2921 | flagellar L-ring protein\x3b FlgH                                    | -0.42     | -2.84     |
| mlr0480 | unknown protein                                                      | -0.88     | -2.86     |
| ml16123 | 5-methyltetrahydropteroyltriglutamate-homocysteine methyltransferase | -0.52     | -2.86     |
| mlr5157 | unknown protein                                                      | -0.76     | -2.87     |
| mlr3356 | phosphonate ABC transporter (permease)                               | -0.68     | -2.94     |
| msr1274 | sarcosine oxidase delta subunit                                      | -0.35     | -2.96     |
| mlr2913 | flagellar hook-basal body protein\x3b FleE                           | -1.42     | -2.96     |
| ml12946 | unknown protein                                                      | -0.62     | -2.99     |
| mlr2911 | flagellar basal-body rod protein\x3b FlgB                            | -0.96     | -3.00     |
| mlr2928 | flagellar basal-body MS-ring protein\x3b FliF                        | -0.28     | -3.03     |
| mlr2924 | flagellar biosynthesis protein\x3b FliP                              | 0.06      | -3.30     |
| ml15088 | S-adenosyl L-homocystein hydrolase                                   | -0.67     | -3.66     |

**Table S7.** Real-time qPCR conditions for plant genes expression analysis.

| Temperature                        | Time       |
|------------------------------------|------------|
| PCR                                |            |
| 50 °C                              | 20 s       |
| 95 °C                              | 10 min     |
| 40 cycles:                         |            |
| 95 °C                              | 15 s       |
| 60 °C                              | 1 min      |
| Melting curve                      |            |
| 60 °C -> 95 °C<br>(in 0.5 °C inc.) | 5 s / step |

**Table S8.** Real-time qPCR conditions for bacteria genes expression analysis.

| Temperature                        | Time       |
|------------------------------------|------------|
| PCR                                |            |
| 95 °C                              | 2 min      |
| 40 cycles:                         |            |
| 95 °C                              | 15 s       |
| 60 °C                              | 30 s       |
| Melting curve                      |            |
| 60 °C -> 95 °C<br>(in 0.5 °C inc.) | 5 s / step |

**Table S9.** Accessions of genes, sequences of primers and product lengths for real-time qPCR. bp - base pairs.

| Gene                                                           | Forward primer sequence<br>5' → 3' | Reverse primer sequence<br>5' → 3' | Product length<br>[bp] |
|----------------------------------------------------------------|------------------------------------|------------------------------------|------------------------|
| SmRpoE1 - RNA polymerase sigma factor protein                  | AGGAAGAGGTCTCGGAATTGAT             | TCCTGGTAGCGATAACCCTCTA             | 367                    |
| SmNodC - NodC N-acetylglucosaminyltransferase                  | GGAGTATTGGCTTGCCTGTAAC             | CCAGTCGCTATTGGACAATGTA             | 622                    |
| MIRecA - recombinase A                                         | AGAGGATAAGGCAGTGGACAAA             | GAGATCAGCAGGTTTCAAGGT              | 357                    |
| MINodC - chitooligosaccharide synthase NodC                    | CTAGCAATCGCAGTGAACTTG              | CCAATCGCTGTTGCTTAATGTA             | 665                    |
| MtFAR - F-box/ankyrin repeat SKIP35-like protein               | CCATGTCCAGTTCTCTTCATTG             | ATTGTCACTACTCCCAAGCTCAT            | 89                     |
| MtERD - early-responsive to dehydration stress                 | ACCACGTTTGTAGCTGAAGG               | TCCTCAGAAAGGTTCCAAGC               | 105                    |
| MtDEH - dehydrin                                               | ACAAGCCATGGCAGATACAAC              | ATCAACAAAAACACCGTCGTC              | 67                     |
| LjERD - early-responsive to dehydration stress                 | CATTCCTTCCCCTGATTGG                | TGATAATGAGAGAAGTTGATCCTC<br>A      | 67                     |
| LjDEH - dehydrin                                               | AAAGGAACAAGATCATCAAAAACC           | ACGTTGTCAAACCTCAGTGAGGA            | 72                     |
| MtFAR - F-box/ankyrin repeat SKIP35-like protein               | CCATGTCCAGTTCTCTTCATTG             | ATTGTCACTACTCCCAAGCTCAT            | 89                     |
| MtPLT2 - PLT2 Integrase-type DNA-binding superfamily protein   | CAAACGAAGTTCCAAAGGTTG              | GGCTGCAAGATCTGACTCATT              | 77                     |
| MtAIL5 - AIL5 AINTEGUMENTA-like 5                              | TCTTTTCCACTCCTTCACACC              | GGGTGTGTGCTTCCTGTGAG               | 75                     |
| MtAIL6 - AIL6 AINTEGUMENTA-like 5                              | GAACAATCAATCTGGTTTGTGG             | TGTGTTTCTGTTGACTGTCACC             | 98                     |
| MtANT_1 - ANT Integrase-type DNA-binding superfamily protein 1 | TTGACATTAACAATGAAAATAACTGG<br>T    | TGATGAGTGTGTGAAGAAACACC            | 85                     |
| MtANT_2 - ANT Integrase-type DNA-binding superfamily protein 2 | TCTCAACATCATCATCCTAGTCATC          | TGACATCAAGTAAAAGTTAGAGG<br>GAAC    | 96                     |
| MtANT_3 - ANT Integrase-type DNA-binding superfamily protein 3 | GTTTCTCTCTCTCACCCCACA              | GAAGTTTGAGTATGTTGGTAATGA<br>TGA    | 70                     |
| MtBBM - BBM Integrase-type DNA-binding superfamily protein     | CTCATCAGCCGGAAGCAT                 | GTTTCTGAGCCATGTTTTATCATA<br>G      | 95                     |
| MtCCD7 - CCD7 carotenoid cleavage dioxygenase 7                | CCCAACCCCTCATCTTACAA               | TTGGTTATTGTTGGGGTAAGG              | 83                     |

|                                                                                                                    |                                                   |                                                             |    |
|--------------------------------------------------------------------------------------------------------------------|---------------------------------------------------|-------------------------------------------------------------|----|
| MtCCD8 - CCD8 carotenoid cleavage dioxygenase 8                                                                    | CGGAGAAACGTTACAGAGACC                             | TTCCCATCTCTCTTGATGGATAC                                     | 77 |
| MtSDR2 - SDR2 NAD(P)-binding Rossmann-fold superfamily protein                                                     | TCTCTTCACTCTACAGACACCACA                          | ATTTTTCCTTCCAACCTCTTAGG                                     | 62 |
| MtNCED4 - NCED4 nine-cis-epoxycarotenoid dioxygenase 4                                                             | TGGTCCCTAAACCCATCATAA                             | TGGTTTTGATGGATGAGATGTT                                      | 87 |
| MtNCED5 - NCED5 nine-cis-epoxycarotenoid dioxygenase 5                                                             | CAACACAAATGGAACCTTCTACA                           | GATTAAGGTTGTTTCGACGAAGTC                                    | 69 |
| LjPP2AA - protein phosphatase 2A regulatory subunit A                                                              | TGAGCTATGTGAAGCTGTTGGT                            | CAGCCTCATTATCACGCAGTAG                                      | 93 |
| LjPLT2 - PLT2 Integrase-type DNA-binding superfamily proteinMtNCED4 - NCED4 nine-cis-epoxycarotenoid dioxygenase 4 | CGTGGAGTTACAAGGCATCATGGTCC<br>CTAAACCCATCATAA     | CTGCAACTCTTCCAATCCTTGTGG<br>TTTIGATGGATGAGATGTT             | 61 |
| LjAIL5 - AIL5 AINTEGUMENTA-like 5MtNCED5 - NCED5 nine-cis-epoxycarotenoid dioxygenase 5                            | GCTTATGATCTTGCAGCTCTCACAAC<br>ACAAATGGAACCTTCTACA | GTTGCAAATTGGGAAGTTGGGATT<br>AAGGTTGTTTCGACGAAGTC            | 66 |
| LjAIL6 - AIL6 AINTEGUMENTA-like 6LjPP2AA - protein phosphatase 2A regulatory subunit A                             | CTACGGCGAGGAGCAAGTTGAGCTAT<br>GTGAAGCTGTTGGT      | CAACGCGTTCATGAAAAGAACAG<br>CCTCATTATCACGCAGTAG              | 64 |
| LjANT- ANT Integrase-type DNA-binding superfamily proteinLjSCR_2 - SCR GRAS family transcription factor 2          | GCTGAAGTGGTTCACCAAGATCATG<br>ATTCTGCCCCACA        | AGTCCATAATAGAAGCCATAGTT<br>GCAGTGATGATCAGCAATGTTTGG         | 71 |
| LjCCD7 - CCD7 carotenoid cleavage dioxygenase 7LjPLT2 - PLT2 Integrase-type DNA-binding superfamily protein        | CAACATACATTCTCCCTCATCGTG<br>GAGTTACAAGGCATCA      | TTGGTTACCAGCGGCAAGCTGCA<br>ACTCTTCCAATCCTTG                 | 67 |
| LjCCD8 - CCD8 carotenoid cleavage dioxygenase 8LjAIL5 - AIL5 AINTEGUMENTA-like 5                                   | CAAATGTTGCAAGTCCATCAGGCTTA<br>TGATCTTGAGCTCTCA    | TCATCGGAGGTCCCTGACGTTGCA<br>AATTGGGAAGTTGG                  | 70 |
| LjSDR2 - SDR2 NAD(P)-binding Rossmann-fold superfamily proteinLjAIL6 - AIL6 AINTEGUMENTA-like 6                    | GGAAGGTAAAGTCGCCATTGCTACGG<br>CGAGGAGCAAGT        | AAAACCTCTACCGTTGCTTCACAA<br>CGCGTTCATGAAAAGAA               | 66 |
| LjNCED4 - NCED4 nine-cis-epoxycarotenoid dioxygenase 4LjANT- ANT Integrase-type DNA-binding superfamily protein    | CACGCCCTCCGTATCTCAGCTGAAGT<br>GGTTCCACCAAG        | TTTTGTATTGTATGTTTIGACGTA<br>GCAGTCCATAATAGAAGCCATAG<br>TTGC | 70 |
| LjNCED5 - NCED5 nine-cis-epoxycarotenoid dioxygenase 5LjCCD7 - CCD7 carotenoid cleavage dioxygenase 7              | CATTCTATGACTTGGGCTTCCCAACA<br>TACATTCTCCCTCAT     | TGTAGAGCACAATCCACCTTCTT<br>GGTTACCAGCGGCAAG                 | 61 |
| MI16SrRNA - 16S ribosomal RNALjCCD8 - CCD8 carotenoid cleavage dioxygenase 8                                       | GCCTTTGATACTGGGTATCTCGCAAAT<br>GTTGCAAGTCCATCAG   | GAATTTACCTCTACACTCGGAAT<br>TCATCGGAGGTCCCTGAC               | 67 |

|                                                                                                            |                                              |                                                  |    |
|------------------------------------------------------------------------------------------------------------|----------------------------------------------|--------------------------------------------------|----|
| MIKu - Ku protein LjSDR2 - SDR2 NAD(P)-binding Rossmann-fold superfamily protein                           | CTATGTCGATGCCGAAACCGGAAGGT<br>AAAGTCGCCATTG  | TCCAATTCATAGCCCTTGATCTAA<br>AACTCTCACCGTTGCTTCA  | 66 |
| MIHisKin_1 - sensory transduction DNA-binding kinaseLjNCED4 - NCED4 nine-cis-epoxycarotenoid dioxygenase 4 | GCCTATCCCGAGGTCGATACCACGCC<br>CTCCGTATCTCA   | CAAGGTCGAAAGGCTTGGTTTTGT<br>ATTTGTATGTTTGACGTAGC | 85 |
| MIHisKin_3 - sensory transduction DNA-binding kinaseLjNCED5 - NCED5 nine-cis-epoxycarotenoid dioxygenase 5 | TCAGGTTGGGTCGATGCCATTCTATG<br>ACTTGGGCTTTCC  | GCTTCTGCTCGGTCGTCTTGTAGA<br>GCACAATCCACCTTTC     | 86 |
| MIOTsA - OtsA trehalose-6-phosphate synthase Ml16SrRNA - 16S ribosomal RNA                                 | AACGCTGCGTCACATCCTGCCTTTGAT<br>ACTGGGTATCTCG | CACGGTTTGAGACGACGATGAAT<br>TTCACCTCTACACTCGGAAT  | 65 |
| MICarS - cardiolipin synthase phospholipase D family protein MIKu - Ku protein                             | TCGACCGATAAAATCAAAGCACTATG<br>TCGATGCCGAAACC | GCGAACGCATCGTAATTGTTCCAA<br>TTCATAGCCCTTGATCT    | 68 |
| MIHisKin_1 - sensory transduction DNA-binding kinase                                                       | GCCTATCCCGAGGTCGATAC                         | CAAGGTCGAAAGGCTTGG                               | 85 |
| MIHisKin_3 - sensory transduction DNA-binding kinase                                                       | TCAGGTTGGGTCGATGC                            | GCTTCTGCTCGGTCGTCT                               | 86 |
| MIOTsA - OtsA trehalose-6-phosphate synthase                                                               | AACGCTGCGTCACATCCT                           | CACGGTTTGAGACGACGAT                              | 65 |
| MICarS - cardiolipin synthase phospholipase D family protein                                               | TCGACCGATAAAATCAAAGCA                        | GCGAACGCATCGTAATTGT                              | 68 |

**Table S10.** The confirmation of RNA-Seq results by real-time qPCR.

| Protein / Gene ID                                            |                   | RNA-Seq results |           |           | Real-time qPCR results |           |           |
|--------------------------------------------------------------|-------------------|-----------------|-----------|-----------|------------------------|-----------|-----------|
|                                                              |                   | T0vsR_FC        | T2vsT0_FC | T4vsT0_FC | T0vsR_FC               | T2vsT0_FC | T4vsT0_FC |
| <b>PLT2 Integrase-type DNA-binding superfamily protein</b>   |                   |                 |           |           |                        |           |           |
| MTR_2g098180                                                 | <i>MtPLT2</i>     | 1.21            | -1.13     | -1.32     | -2.68                  | 2.14      | 1.61      |
| Lj3g3v3245260                                                | <i>LjPLT2</i>     | -33.41          | -1.59     | -1.59     | -213.74                | -1.06     | -1.52     |
| <b>AIL5 AINTEGUMENTA-like 5</b>                              |                   |                 |           |           |                        |           |           |
| MTR_4g127930                                                 | <i>MtAIL5</i>     | -2.22           | -1.17     | -1.58     | -3.50                  | -1.35     | -1.40     |
| Lj4g3v2120330                                                | <i>LjAIL5</i>     | -2.20           | 1.39      | 2.27      | -2.89                  | 1.25      | 2.53      |
| <b>AIL6 AINTEGUMENTA-like 6</b>                              |                   |                 |           |           |                        |           |           |
| MTR_5g031880                                                 | <i>MtAIL6</i>     | 5.69            | -1.42     | -2.11     | 2.67                   | -1.17     | -1.12     |
| Lj2g3v1455120                                                | <i>LjAIL6</i>     | -7.18           | -1.40     | -1.98     | -9.86                  | -1.63     | -2.09     |
| <b>ANT Integrase-type DNA-binding superfamily protein</b>    |                   |                 |           |           |                        |           |           |
| MTR_4g097520                                                 | <i>MtANT_1</i>    | -9.54           | 1.03      | 1.01      | -23.52                 | 1.14      | 1.25      |
| MTR_1g017400                                                 | <i>MtANT_2</i>    | -8.73           | 1.17      | 1.21      | -23.68                 | 1.29      | 1.35      |
| MTR_3g103460                                                 | <i>MtANT_3</i>    | -7.15           | 1.19      | -1.16     | -10.77                 | 1.47      | 1.25      |
| Lj4g3v0708640                                                | <i>LjANT</i>      | -17.71          | 1.28      | -1.22     | -21.81                 | 1.41      | -1.44     |
| <b>BBM Integrase-type DNA-binding superfamily protein</b>    |                   |                 |           |           |                        |           |           |
| MTR_7g080460                                                 | <i>MtBBM</i>      | 3.35            | -1.27     | -2.19     | 2.18                   | -1.09     | -1.54     |
| <b>NCED4 nine-cis-epoxycarotenoid dioxygenase 4</b>          |                   |                 |           |           |                        |           |           |
| MTR_5g025270                                                 | <i>MtNCED4</i>    | -1.01           | -1.06     | 1.13      | 1.04                   | -1.68     | -1.51     |
| Lj2g3v1561960                                                | <i>LjNCED4</i>    | -6.32           | 2.86      | 2.19      | -9.15                  | 1.95      | 1.73      |
| <b>NCED5 nine-cis-epoxycarotenoid dioxygenase 5</b>          |                   |                 |           |           |                        |           |           |
| MTR_2g070460                                                 | <i>MtNCED5</i>    | 3.15            | 1.07      | -1.48     | 6.27                   | -2.93     | -4.21     |
| Lj4g3v2467280                                                | <i>LjNCED5</i>    | -2.90           | -1.11     | 1.19      | -3.47                  | 1.28      | 1.66      |
| <b>SDR2 NAD(P)-binding Rossmann-fold superfamily protein</b> |                   |                 |           |           |                        |           |           |
| MTR_7g071680                                                 | <i>MtSDR2</i>     | -1.05           | -3.88     | -3.51     | -1.78                  | -3.14     | -1.80     |
| Lj0g3v0160209                                                | <i>LjSDR2</i>     | -2.69           | -4.17     | -8.17     | -4.25                  | -5.76     | -10.24    |
| <b>Ku protein</b>                                            |                   |                 |           |           |                        |           |           |
| mll4607                                                      | <i>MLKu</i>       | -               | 2.28      | 14.17     | -                      | 3.75      | 36.42     |
| <b>Sensory histidine kinase 1</b>                            |                   |                 |           |           |                        |           |           |
| mll1133                                                      | <i>MLHisKin_1</i> | -               | 1.67      | 1.86      | -                      | 1.05      | 1.39      |
| <b>Sensory histidine kinase 3</b>                            |                   |                 |           |           |                        |           |           |
| mlr3704                                                      | <i>MLHisKin_3</i> | -               | 3.65      | 19.47     | -                      | 4.91      | 27.32     |
| <b>OtsA trehalose-6-phosphate synthase</b>                   |                   |                 |           |           |                        |           |           |
| mll0691                                                      | <i>MIOTsA</i>     | -               | 4.47      | 17.55     | -                      | 3.65      | 15.69     |
| <b>Cardiolipin synthase</b>                                  |                   |                 |           |           |                        |           |           |
| mlr9675                                                      | <i>MLCarS</i>     | -               | 2.67      | 17.59     | -                      | 2.45      | 15.72     |
